# Supplementary material
Source: publisher figshare collection journal article supplement (https://gsajournals.figshare.com/ndownloader/files/28169448)
Supplement: Supplementary file 1 [file 28169448]

## Sheet: Table S2
Table S3 Genes present at the various ⍺-factor pheromone loci *
Protein Name	Colour	Representative Species	Representative Accession
Integral membrane protein		C. orchidophilum	XP_022480691.1
FAD-Linked oxidoreductase		C. tanaceti	TKW50856.1
Major facilitator superfamily transporter		C. orchidophilum	XP_022480692.1
DUF1640 domain containing protein		C. higginsianum	XP_018153148.1
Hypothetical protein CNYM01_07609		C. nymphaeae	KXH49616.1
TPR protein		C. graminicola	XP_008095352.1
Hypothetical protein GLRG_02447		C. graminicola	XP_008090647.1
Heterokaryon incompatibility protein		C. scovillei	KAF4773126.1
Fatty acid amide hydrolase		Fusarium albosuccineum	KAF4458444.1
Putative membrane protein		C. fructicola	KAF5508793.1
Primary amine oxidase		Fusarium albosuccineum	KAF4468704.1
Hypothetical protein C8035_v002382		C. spinsosum	TDZ13821.1
Hypothetical protein C8035_v002381		C. spinsosum	TDZ13820.1
*Refer to Fig. 2
